# Supplementary material for: Transcriptional Profiling of Host Cell Responses to Virulent Haemophilus parasuis: New Insights into Pathogenesis
Source: MDPI journal article supplement (doi:10.3390/ijms19051320), 2018-04-29
Supplement: s1 [file s1]

**Supplementary Table S1. Statistical summary analysis of RNA-seq datasets of infection cells and control cells.**

| Samples         | Means and SD of Raw       |                          |              | Means and SD of Mapping |                       |                       |
|-----------------|---------------------------|--------------------------|--------------|-------------------------|-----------------------|-----------------------|
|                 | Raw reads                 | Clean reads              | Q20 Value    | Total Mapped Reads      | Uniquely Mapped Reads | Uniquely Mapped ratio |
| Infection cells | 108360513.3<br>±8018440.6 | 107734910<br>±7965745.8  | 97.7<br>±0.1 | 24967595<br>±17508433   | 22047651<br>±15438811 | 88.5<br>±0.9          |
| Control cells   | 71624665.3<br>±2420491.4  | 71063982.7<br>±2410841.6 | 97.9<br>±0.1 | 45220205<br>±8624953    | 40763421<br>±7660539  | 90.2<br>±0.3          |
