# Supplementary material for: Transcriptional Profiling of Host Cell Responses to Virulent Haemophilus parasuis: New Insights into Pathogenesis
Source: MDPI journal article supplement (doi:10.3390/ijms19051320), 2018-04-29
Supplement: s1 [file s1]

**Supplementary Table S3 Primers for qRT-PCR.**

| <b>Gene</b>    | <b>Nucleotide sequence (5'-3')</b> |                         |
|----------------|------------------------------------|-------------------------|
| $\beta$ -actin | Forward                            | TGCGGGACATCAAGGAGAAG    |
|                | Reverse                            | AGTTGAAGGTGGTCTCGTGG    |
| CDKN2D         | Forward                            | GTTTGTGGCTTGTTGGTGTGAT  |
|                | Reverse                            | TGCCCTTGGGACTTGTCTGTAG  |
| PTEN           | Forward                            | GAAAATGGAGGTCTGTGTGA    |
|                | Reverse                            | TGGAGAAAAGTATCGGTTGG    |
| IL7R           | Forward                            | CACTTCAGAACGCCAGAGACC   |
|                | Reverse                            | CAGAATGACCATCAGAGCCAC   |
| SGK1           | Forward                            | ATGCCAACCCTTCTCCTCCT    |
|                | Reverse                            | AAAACTGCCCTTCCCAATCA    |
| MRAS           | Forward                            | ATGTCACCACCCCAACCCTA    |
|                | Reverse                            | AGCCCAGTCAATGAGCAAAAC   |
| F2R            | Forward                            | CTGAAGGACATAGAGGACCAA   |
|                | Reverse                            | TAGAGGAAGGCTTACGAGAAA   |
| FGF16          | Forward                            | AATGCCTTCTTCCCTCCGTG    |
|                | Reverse                            | GGTTTCTTTGTTCTGTTGCTCCC |
| PARD6G         | Forward                            | GCGAAGACGAGGCTAAGTGG    |
|                | Reverse                            | TGTTGGAGATGTGGTGGGTG    |
| PKN2           | Forward                            | ACTCTCCAAACCAGCAGCAC    |
|                | Reverse                            | TTCAAAACCGCACACACATC    |
| ATF6B          | Forward                            | CCAGCCATCAGCCACAACAAG   |
|                | Reverse                            | GGGTCCGAAACAGCATTACACG  |
| HMGB1          | Forward                            | CTATCCATTGGTGATGTTGC    |
|                | Reverse                            | TCCTCCTCTTCCTTCTTTTT    |
| MAPK14         | Forward                            | CTGCTGCTTGTCCTGTTCTCTT  |
|                | Reverse                            | ACATCCACCTGTTCTGTTTCTTC |
