# Supplementary material for: Transcriptional Profiling of Host Cell Responses to Virulent Haemophilus parasuis: New Insights into Pathogenesis
Source: Int J Mol Sci. 2018 Apr 29;19(5):1320. doi: 10.3390/ijms19051320 (PMC5983834; doi:10.3390/ijms19051320)
Supplement: Supplementary file 1 [file ijms-19-01320-s001.zip › Supplementary Table 2.xls]

## Sheet: Sheet1
UP-regulated genes			Down-regulated genes
ID	log2FoldChange	Name	ID	log2FoldChange	Name
ENSSSCG00000000010	-5.22086	-	ENSSSCG00000000066	4.65416	L3MBTL2
ENSSSCG00000000175	-5.61987	-	ENSSSCG00000000895	4.5441	SNRPF
ENSSSCG00000000228	-3.96415	SCN8A	ENSSSCG00000000951	4.34	CSRP2
ENSSSCG00000000353	-5.04448	-	ENSSSCG00000001440	4.73703	NOTCH4
ENSSSCG00000000384	-4.74326	NABP2	ENSSSCG00000001550	4.4474	ARMC12
ENSSSCG00000000512	-4.36057	TBC1D15	ENSSSCG00000001556	4.37074	MAPK14
ENSSSCG00000000541	-4.29792	FAR2	ENSSSCG00000001838	4.47214	POLG
ENSSSCG00000000572	-5.02927	CMAS	ENSSSCG00000003512	4.7121	-
ENSSSCG00000000607	-5.66914	ART4	ENSSSCG00000004948	4.20114	SMAD6
ENSSSCG00000000690	-5.44142	-	ENSSSCG00000005612	4.18727	RPL12
ENSSSCG00000000754	-5.37618	RAD52	ENSSSCG00000006364	5.19782	DEDD
ENSSSCG00000000793	-4.91138	PPHLN1	ENSSSCG00000007345	4.42951	-
ENSSSCG00000000931	-5.49127	MGAT4C	ENSSSCG00000008397	4.80159	EFEMP1
ENSSSCG00000001042	-4.86178	MAK	ENSSSCG00000008940	4.90857	GRSF1
ENSSSCG00000001430	-6.061	ATF6B	ENSSSCG00000009192	4.5571	PDLIM5
ENSSSCG00000001564	-4.66266	SRSF3	ENSSSCG00000009879	5.02366	-
ENSSSCG00000001569	-5.03745	C6orf89	ENSSSCG00000010319	4.4754	SAMD8
ENSSSCG00000001619	-4.36967	FOXP4	ENSSSCG00000011201	4.64388	SATB1
ENSSSCG00000001816	-4.72299	-	ENSSSCG00000011384	4.47734	-
ENSSSCG00000001819	-5.23959	MAN2A2	ENSSSCG00000011794	5.41237	SENP2
ENSSSCG00000001899	-4.55005	LMAN1L	ENSSSCG00000012744	4.745	CD99L2
ENSSSCG00000001908	-4.99005	CCDC33	ENSSSCG00000012793	4.86468	HCFC1
ENSSSCG00000002370	-6.17353	AREL1	ENSSSCG00000013341	4.53515	LUZP2
ENSSSCG00000002378	-5.37877	MLH3	ENSSSCG00000013361	4.69486	-
ENSSSCG00000002429	-4.49186	FOXN3	ENSSSCG00000013635	4.48316	TIMM29
ENSSSCG00000002526	-4.50111	RCOR1	ENSSSCG00000013901	4.96735	IFI30
ENSSSCG00000002860	-6.1309	PDCD5	ENSSSCG00000013908	5.60745	C19orf60
ENSSSCG00000003021	-6.25077	MEGF8	ENSSSCG00000015066	4.40784	ZPR1
ENSSSCG00000003070	-4.46987	ZNF45	ENSSSCG00000015079	4.03484	BACE1
ENSSSCG00000003088	-4.87034	APOE	ENSSSCG00000015286	4.14102	DSTYK
ENSSSCG00000003126	-5.35066	CABP5	ENSSSCG00000015314	4.76749	ANKIB1
ENSSSCG00000003423	-5.16491	DRAXIN	ENSSSCG00000015948	4.61229	DYNC1I2
ENSSSCG00000003428	-4.48996	MTHFR	ENSSSCG00000017626	4.61593	SRSF1
ENSSSCG00000003513	-5.72539	ECE1	ENSSSCG00000021715	4.51617	-
ENSSSCG00000003694	-3.95929	EMILIN2	ENSSSCG00000021764	4.39996	-
ENSSSCG00000003794	-4.74093	RPE65	ENSSSCG00000022204	5.01498	-
ENSSSCG00000003826	-6.14682	HOOK1	ENSSSCG00000023363	4.67762	-
ENSSSCG00000003877	-4.7011	FAF1	ENSSSCG00000023371	4.27196	EHD2
ENSSSCG00000004020	-5.09767	SFT2D1	ENSSSCG00000023482	4.63822	-
ENSSSCG00000004077	-4.47868	FBXO5	ENSSSCG00000024201	4.45541	FAM208A
ENSSSCG00000004092	-4.59036	-	ENSSSCG00000024393	4.54043	B3GNT5
ENSSSCG00000004109	-4.62727	ZC3H12D	ENSSSCG00000026224	4.37057	ARHGAP31
ENSSSCG00000004121	-4.24778	FBXO30	ENSSSCG00000027700	4.85655	RPRD1A
ENSSSCG00000004141	-5.96705	NMBR	ENSSSCG00000027897	5.17304	-
ENSSSCG00000004205	-5.02516	-	ENSSSCG00000029539	4.30347	RAB23
ENSSSCG00000004218	-4.9088	RSPO3
ENSSSCG00000004254	-4.26836	DCBLD1
ENSSSCG00000004339	-5.16015	UFL1
ENSSSCG00000004499	-4.46559	ATP5A1
ENSSSCG00000004621	-4.75255	MYO5C
ENSSSCG00000004733	-4.90729	PLA2G4D
ENSSSCG00000004745	-4.90107	RPAP1
ENSSSCG00000004812	-5.07747	IGF1R
ENSSSCG00000004931	-5.10468	IGDCC4
ENSSSCG00000005126	-4.72379	PLAA
ENSSSCG00000005506	-4.15067	MEGF9
ENSSSCG00000005591	-6.20593	ADGRD2
ENSSSCG00000005618	-5.36217	-
ENSSSCG00000005710	-4.56827	LAMC3
ENSSSCG00000006149	-5.05597	RALYL
ENSSSCG00000006214	-5.49473	RRS1
ENSSSCG00000006260	-4.73929	-
ENSSSCG00000006278	-4.84382	-
ENSSSCG00000006280	-5.6068	-
ENSSSCG00000006282	-4.48281	-
ENSSSCG00000006376	-5.33153	-
ENSSSCG00000006682	-5.51201	-
ENSSSCG00000006796	-5.20578	CHI3L2
ENSSSCG00000006800	-5.23194	CD53
ENSSSCG00000006927	-4.75463	PKN2
ENSSSCG00000006930	-4.46294	SH3GLB1
ENSSSCG00000006969	-4.27882	KIAA1456
ENSSSCG00000007161	-5.51033	LZTS3
ENSSSCG00000007185	-5.26199	SIRPB2
ENSSSCG00000007425	-5.01139	SNX21
ENSSSCG00000007675	-5.35893	-
ENSSSCG00000007823	-4.98903	-
ENSSSCG00000007839	-4.59922	EEF2K
ENSSSCG00000007932	-4.55281	ROGDI
ENSSSCG00000008069	-5.96706	-
ENSSSCG00000008300	-4.50578	STAMBP
ENSSSCG00000008336	-4.86557	ANXA4
ENSSSCG00000008470	-4.65858	THUMPD2
ENSSSCG00000008515	-5.55381	MEMO1
ENSSSCG00000008648	-6.52092	RSAD2
ENSSSCG00000008901	-5.3325	PAICS
ENSSSCG00000008913	-6.93382	IGFBP7
ENSSSCG00000008982	-5.32621	STBD1
ENSSSCG00000008983	-5.78827	CCDC158
ENSSSCG00000009093	-5.05518	BBS7
ENSSSCG00000009127	-4.96285	ALPK1
ENSSSCG00000009457	-4.69946	-
ENSSSCG00000009474	-5.39283	-
ENSSSCG00000009482	-4.537	SPRY2
ENSSSCG00000009495	-5.21771	-
ENSSSCG00000009497	-5.20845	-
ENSSSCG00000009505	-5.09439	MBNL2
ENSSSCG00000009765	-6.11542	DNAH10
ENSSSCG00000009766	-4.82226	ATP6V0A2
ENSSSCG00000009770	-6.79791	EIF2B1
ENSSSCG00000009972	-4.86522	KREMEN1
ENSSSCG00000010189	-5.76017	NUP133
ENSSSCG00000010440	-5.38567	PTEN
ENSSSCG00000010454	-4.50101	IFIT5
ENSSSCG00000010471	-5.13229	KIF11
ENSSSCG00000010507	-4.93798	TLL2
ENSSSCG00000010651	-5.46696	ABLIM1
ENSSSCG00000010735	-4.85775	LHPP
ENSSSCG00000010773	-5.67017	TUBGCP2
ENSSSCG00000010954	-6.66731	-
ENSSSCG00000010991	-5.50111	AQP3
ENSSSCG00000011057	-4.83531	-
ENSSSCG00000011238	-4.77789	ARPP21
ENSSSCG00000011261	-4.64283	WDR48
ENSSSCG00000011265	-5.69717	XIRP1
ENSSSCG00000011375	-4.77299	USP19
ENSSSCG00000011552	-4.87691	ARPC4
ENSSSCG00000011587	-4.86058	EFCAB12
ENSSSCG00000011689	-5.04832	PLOD2
ENSSSCG00000011817	-4.90095	-
ENSSSCG00000011973	-3.96162	COL8A1
ENSSSCG00000012026	-5.11628	ADAMTS1
ENSSSCG00000012166	-4.90355	SMS
ENSSSCG00000012171	-4.6295	PRDX4
ENSSSCG00000012179	-4.97735	-
ENSSSCG00000012233	-5.59275	SYTL5
ENSSSCG00000012416	-5.15966	CHIC1
ENSSSCG00000012576	-4.94974	CHRDL1
ENSSSCG00000012727	-5.43644	FMR1
ENSSSCG00000013099	-4.84049	MS4A2
ENSSSCG00000013236	-5.69495	MYBPC3
ENSSSCG00000013311	-4.5963	KIAA1549L
ENSSSCG00000013324	-4.76759	-
ENSSSCG00000013339	-5.60093	ANO3
ENSSSCG00000013475	-5.4919	NCLN
ENSSSCG00000013643	-5.54607	CDKN2D
ENSSSCG00000013651	-4.85208	FDX2
ENSSSCG00000014123	-4.90796	FAM151B
ENSSSCG00000014164	-4.93651	-
ENSSSCG00000014290	-4.79978	LEAP2
ENSSSCG00000014319	-5.16368	SMAD5
ENSSSCG00000014324	-4.41419	MYOT
ENSSSCG00000014325	-5.11011	CDC23
ENSSSCG00000014649	-5.3319	OR52E5
ENSSSCG00000014977	-5.73258	PGR
ENSSSCG00000015025	-4.75942	CRYAB
ENSSSCG00000015201	-4.13474	MSANTD2
ENSSSCG00000015232	-5.1622	ST3GAL4
ENSSSCG00000015334	-4.71879	PDK4
ENSSSCG00000015343	-4.83004	MIOS
ENSSSCG00000015432	-4.88383	ATXN7L1
ENSSSCG00000015509	-5.06764	-
ENSSSCG00000015604	-5.19349	NEK2
ENSSSCG00000015627	-4.57548	ZPBP
ENSSSCG00000015637	-4.56534	SEC61G
ENSSSCG00000015735	-4.95017	PTPN18
ENSSSCG00000015882	-5.77194	BAZ2B
ENSSSCG00000015924	-4.29819	SPC25
ENSSSCG00000016231	-5.09378	-
ENSSSCG00000016254	-6.49982	CCL20
ENSSSCG00000016338	-6.24531	-
ENSSSCG00000016532	-5.42306	WDR91
ENSSSCG00000016628	-4.64066	WNT2
ENSSSCG00000016648	-5.70036	-
ENSSSCG00000016714	-5.2436	CYCS
ENSSSCG00000016832	-5.33476	IL7R
ENSSSCG00000016834	-4.58608	LMBRD2
ENSSSCG00000017072	-4.66634	GALNT10
ENSSSCG00000017136	-5.83079	TBCD
ENSSSCG00000017148	-5.26783	-
ENSSSCG00000017304	-4.62394	EFCAB3
ENSSSCG00000017878	-4.69946	UBE2G1
ENSSSCG00000017968	-4.8235	CNTROB
ENSSSCG00000020672	-4.79907	F2R
ENSSSCG00000021304	-4.79841	-
ENSSSCG00000021354	-5.1946	-
ENSSSCG00000021443	-4.82587	SGK1
ENSSSCG00000021587	-4.6852	MESDC2
ENSSSCG00000021640	-5.78983	ZNF354C
ENSSSCG00000021757	-5.13021	-
ENSSSCG00000021961	-4.90171	-
ENSSSCG00000022314	-5.60771	-
ENSSSCG00000022463	-4.78014	-
ENSSSCG00000022494	-5.63177	TMEM59
ENSSSCG00000022584	-6.09469	PPP1R3F
ENSSSCG00000022833	-5.36435	FGF16
ENSSSCG00000022869	-4.84893	BCAP29
ENSSSCG00000023036	-5.32378	-
ENSSSCG00000023078	-4.77264	WDR4
ENSSSCG00000023241	-4.48795	-
ENSSSCG00000023336	-5.05727	METTL21A
ENSSSCG00000023376	-6.04378	PARD6G
ENSSSCG00000024904	-4.56138	-
ENSSSCG00000024910	-5.42697	-
ENSSSCG00000024919	-5.22652	RDH16
ENSSSCG00000025022	-5.63811	FER1L5
ENSSSCG00000025103	-4.64123	-
ENSSSCG00000025349	-5.53959	CCDC14
ENSSSCG00000025508	-4.47056	-
ENSSSCG00000025590	-5.56621	ZNF461
ENSSSCG00000025611	-4.91614	-
ENSSSCG00000025613	-4.99253	-
ENSSSCG00000025636	-4.56138	-
ENSSSCG00000025647	-4.99405	-
ENSSSCG00000025758	-6.34981	-
ENSSSCG00000025775	-4.95372	TADA2A
ENSSSCG00000025783	-5.46396	ENTPD3
ENSSSCG00000025836	-5.44358	SULT1C4
ENSSSCG00000026025	-5.49816	HMGCL
ENSSSCG00000026552	-6.01121	HIATL1
ENSSSCG00000026718	-5.45384	PLCH1
ENSSSCG00000026719	-4.42864	-
ENSSSCG00000026809	-4.94264	TFDP2
ENSSSCG00000027053	-4.46882	PACSIN1
ENSSSCG00000027223	-4.85775	THAP1
ENSSSCG00000027443	-5.9311	MRAS
ENSSSCG00000027457	-4.16076	UBE2Q2
ENSSSCG00000027559	-4.64926	-
ENSSSCG00000027629	-5.16497	CDIPT
ENSSSCG00000027686	-5.16086	YTHDF2
ENSSSCG00000027812	-5.02645	IQSEC1
ENSSSCG00000027844	-4.91138	-
ENSSSCG00000027898	-5.01221	-
ENSSSCG00000028048	-4.73871	ARHGEF15
ENSSSCG00000028295	-5.02572	ZNF354A
ENSSSCG00000028338	-4.77252	PAMR1
ENSSSCG00000028343	-5.23945	MRPL9
ENSSSCG00000028471	-4.47668	DTHD1
ENSSSCG00000028969	-5.67095	SLC26A4
ENSSSCG00000029125	-4.57357	FAM13B
ENSSSCG00000029189	-5.34482	DCHS1
ENSSSCG00000029946	-4.57321	OR4D10
ENSSSCG00000030355	-4.91481	-
ENSSSCG00000030460	-5.71834	-
ENSSSCG00000030610	-4.65739	-
ENSSSCG00000030621	-4.72244	-
